# Supplementary material
Source: MDPI journal article supplement (https://www.mdpi.com/1424-8247/15/7/836)
Supplement: s1 [file s1]

## Supplementary Figure Legends.

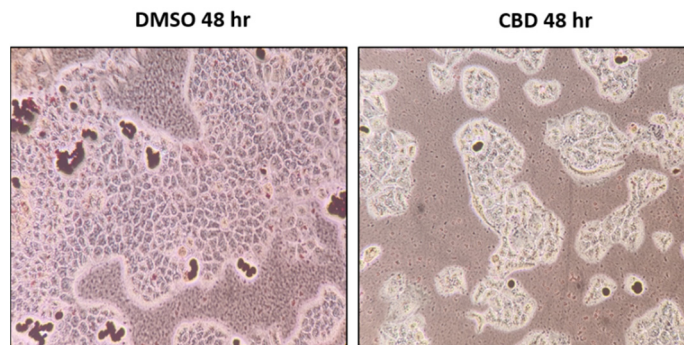

**Figure S1.** Adipocytic differentiation was measured with Oil Red O staining. Intracellular vesicles formed by CBD treatment are not related to adipocyte differentiation.

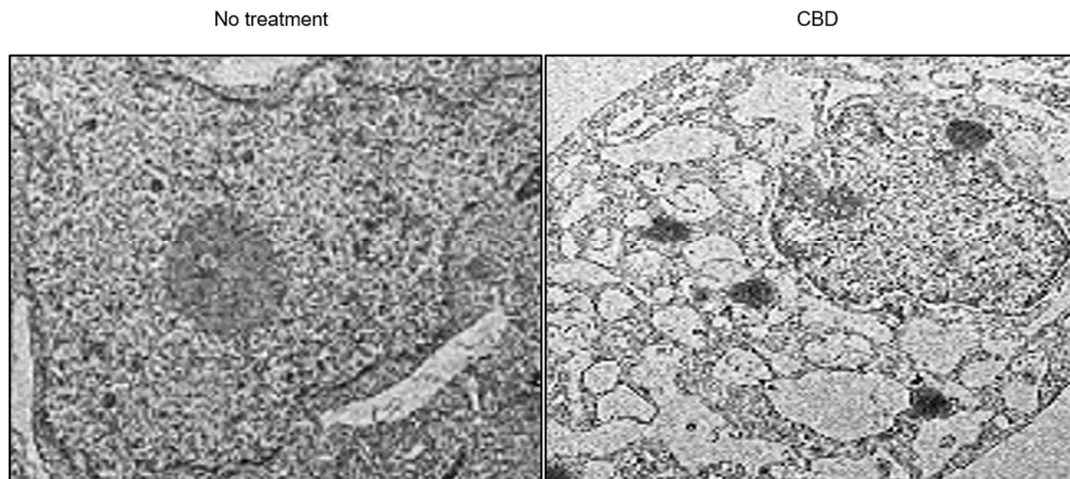

**Figure S2.** Cellular morphology was also observed with scanning electron microscopy (SEM) after 20  $\mu$ M CBD for 48 hours.

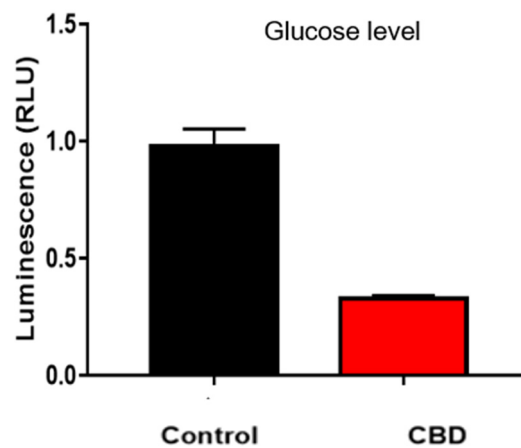

**Figure S3.** Intracellular glucose level was determined after 20  $\mu$ M CBD for 24 hours.

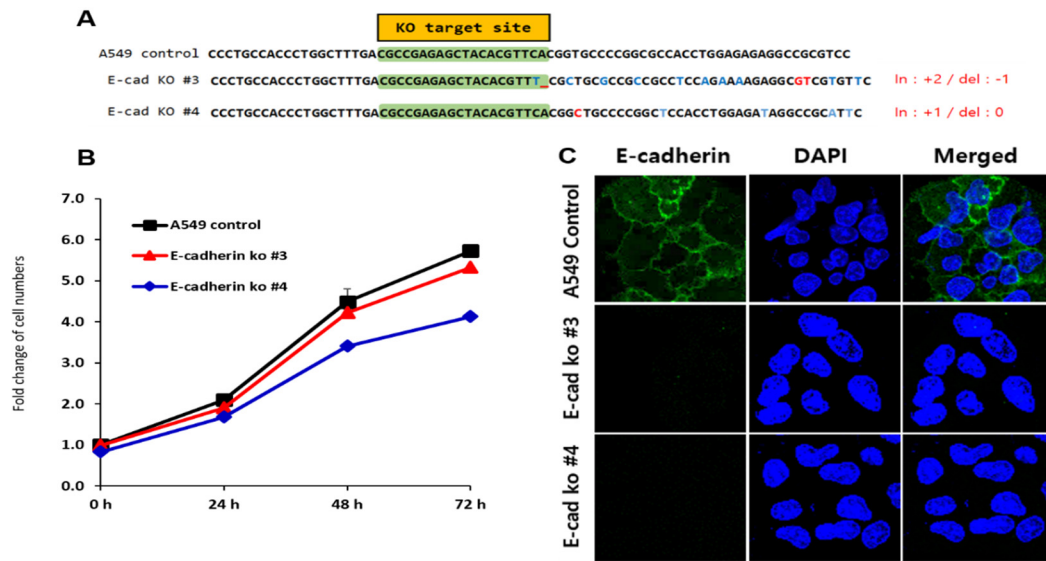

**Figure S4.** Preparation E-cadherin KO clones with CRISPR/cas-9 system. A. KO clones were established with RNA guidance for targeting exon2 of E-cadherin genes. Sequencing data shows several mutations at the target sequences. B. The cell growth rates were slightly slowed in KO clones compared to A549 cells. C. E-cadherin expression was also assessed after CBD-treated condition in E-cadherin KO clones compared to A549 cells.
